# Supplementary material
Source: PubMed Central journal article supplement (PMC337040)

**A**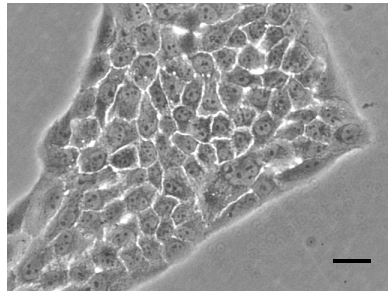

MCF10A

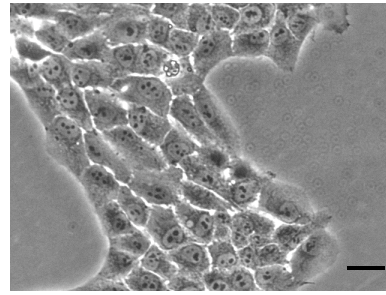

10A.B2

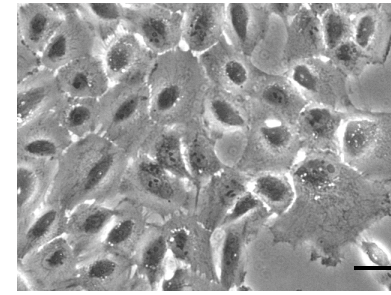10A.B2.TGF $\beta$ 1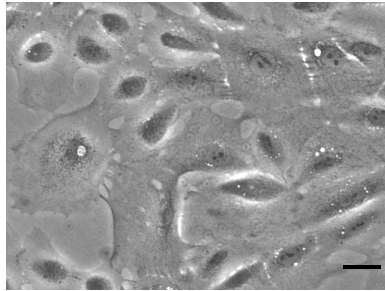10A.TGF $\beta$ 1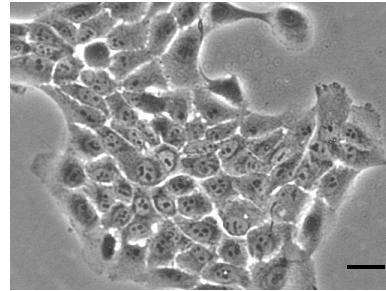

10A.B2 + AP1510

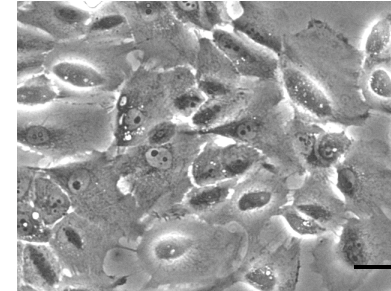10A.B2.TGF $\beta$ 1 + AP1510**B**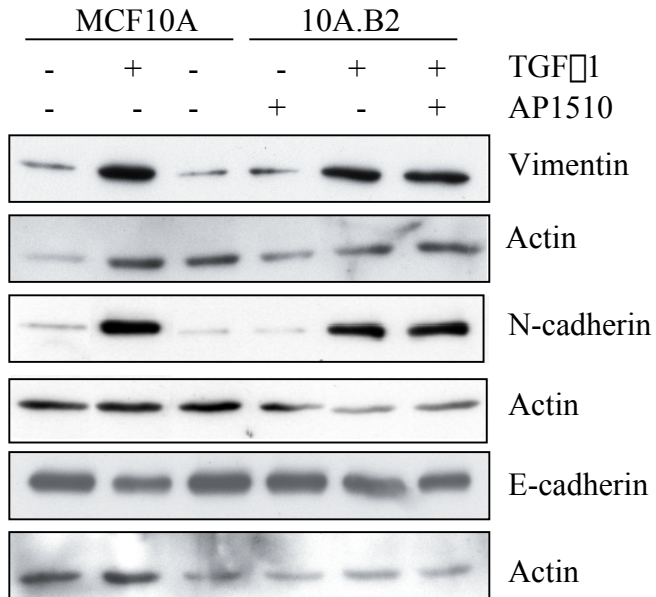**C**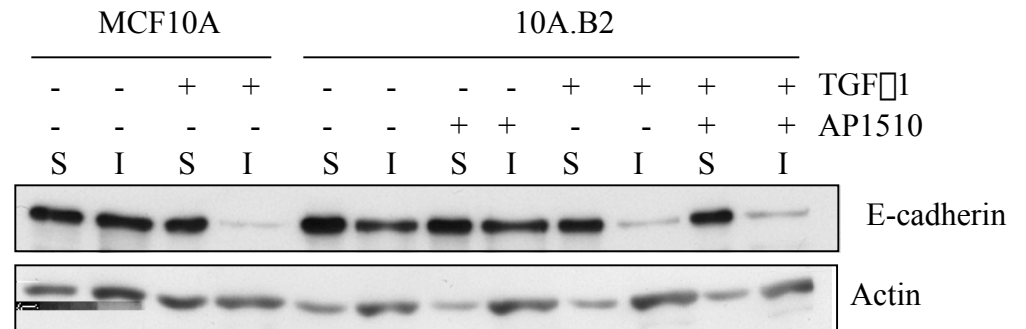

Supplement: pnas_0308090100_3.pdf [file pnas_0308090100_3.pdf]

**A**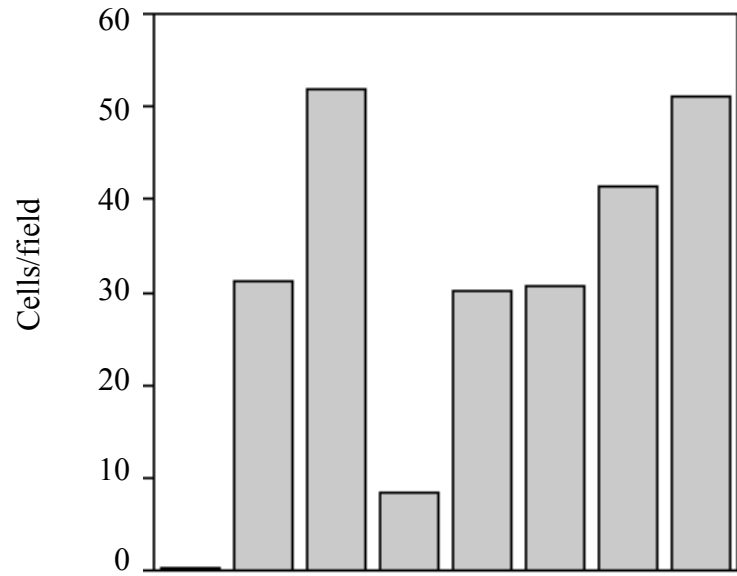

|            |   |   |   |   |   |     |      |     |
|------------|---|---|---|---|---|-----|------|-----|
| AP1510     | + | - | + | + | + | +   | +    | +   |
| TGFβ1      | - | + | + | + | + | +   | +    | +   |
| U0126 (μM) | - | - | - | 5 | 1 | 0.5 | 0.25 | 0.1 |

**B**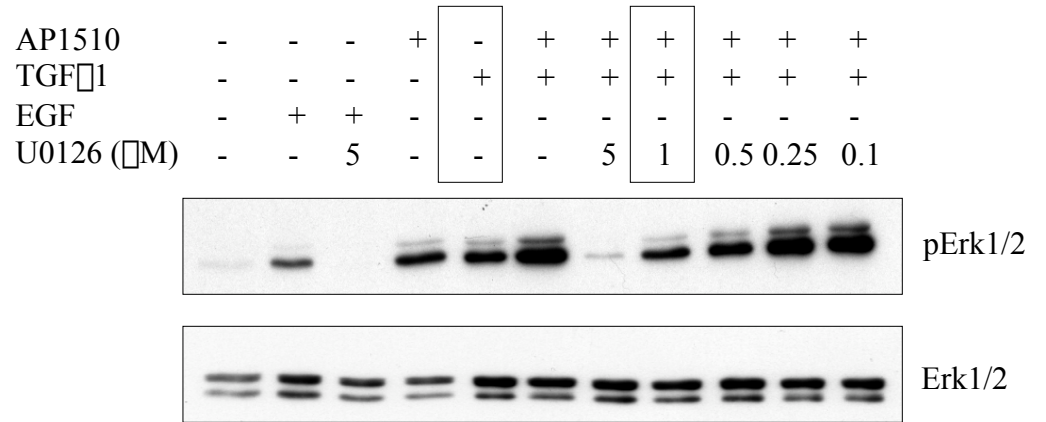

Supplement: pnas_0308090100_5.pdf [file pnas_0308090100_5.pdf]
